# Supplementary material for: Understanding the association between admission source and in-hospital delirium: A cross-sectional study
Source: HighWire-hosted journal article supplement (doi:10.1136/jim-2022-002342), 2022-09-06
Supplement: jim-2022-002342supp002_data_supplement.pdf [file jim-2022-002342supp002_data_supplement.pdf]

Supplemental table: Demographics of outcome

|                                            | <b>bCAM Positive<br/>n=3,925</b> | <b>bCAM Negative<br/>n=26,175</b> | <b>p-value</b> |
|--------------------------------------------|----------------------------------|-----------------------------------|----------------|
| <b>Age (Mean ± SD)</b>                     | 63.4 ± 16.5                      | 57.3 ± 17.2                       | <.0001         |
| <b>Age group (%)</b>                       |                                  |                                   | <.0001         |
| <50                                        | 18.7                             | 30.6                              |                |
| 50 to <65                                  | 28.4                             | 30.4                              |                |
| 65 to <80                                  | 38.0                             | 31.3                              |                |
| 80+                                        | 14.9                             | 7.7                               |                |
| <b>Gender (%)</b>                          |                                  |                                   | 0.0001         |
| Male                                       | 52.2                             | 48.9                              |                |
| Female                                     | 47.8                             | 51.1                              |                |
| <b>Race (%)</b>                            |                                  |                                   | 0.0004         |
| Black                                      | 38.1                             | 34.9                              |                |
| White                                      | 58.5                             | 61.7                              |                |
| Other                                      | 3.4                              | 3.5                               |                |
| <b>Marital Status (%)</b>                  |                                  |                                   | <.0001         |
| Married                                    | 43.2                             | 48.8                              |                |
| Single                                     | 32.4                             | 32.5                              |                |
| Other                                      | 24.5                             | 18.8                              |                |
| <b>Distance to MUSC (&gt;50 Miles) (%)</b> | 44.8                             | 46.3                              | 0.0867         |
| <b>Poverty (%)</b>                         | 31.4                             | 29.6                              | 0.0254         |
| <b>CCI Score (Mean ± SD)</b>               | 5.1 ± 3.1                        | 4.0 ± 3.2                         | <.0001         |
| <b>CCI Score (%)</b>                       |                                  |                                   | <.0001         |
| 0                                          | 5.3                              | 12.9                              |                |
| 1-2                                        | 16.5                             | 25.7                              |                |
| 3-4                                        | 25.4                             | 25.2                              |                |
| 5+                                         | 52.9                             | 36.2                              |                |
| <b>Medication Exposure (%)</b>             |                                  |                                   |                |
| Antipsychotic                              | 51.4                             | 27.5                              | <.0001         |
| Anticholinergic                            | 56.3                             | 64.4                              | <.0001         |
| Opioid                                     | 79.8                             | 83.0                              | <.0001         |
| Benzodiazepine (Anytime)                   | 63.4                             | 37.9                              | <.0001         |
| <b>Group of Specialty (%)</b>              |                                  |                                   | <.0001         |
| ICU                                        | 0.7                              | 0.3                               |                |
| GIM                                        | 53.7                             | 47.2                              |                |
| Neurology                                  | 23.9                             | 14.4                              |                |
| OBGYN                                      | 0.8                              | 2.4                               |                |
